# Supplementary material for: Genetic Parameters and Genotype × Diet Interaction for Body Weight Performance and Fat in Gilthead Seabream
Source: MDPI journal article supplement (doi:10.3390/ani13010180), 2023-01-03
Supplement: s1 [file s1]

### Supplementary material S1

Table S1: Genetic parameters for body weight at different growth stages and fat content for batch 16. Heritability is on the diagonal in bold; genetic and phenotypic correlations are above the diagonal (in green) and below (in blue), respectively. Standard errors are illustrated in the parentheses.

|      | W1          | W2          | W3          | FAT%        |
|------|-------------|-------------|-------------|-------------|
| W1   | <b>0.86</b> | 0.51        | 0.32        | -0.10       |
| W2   | 0.38        | <b>0.48</b> | 0.89        | 0.31        |
| W3   | 0.23        | 0.82        | <b>0.47</b> | 0.31        |
| FAT% | 0.03        | 0.39        | 0.45        | <b>0.39</b> |

Table S2: Genetic parameters for body weight, growth and fat content for batch 16. Heritability is on the diagonal in bold; genetic and phenotypic correlations are above the diagonal (in green) and below (in blue), respectively. Standard errors are illustrated in the parentheses.

|      | G1          | G2          | W3          | FAT%        |
|------|-------------|-------------|-------------|-------------|
| G1   | <b>0.46</b> | 0.90        | 0.90        | 0.33        |
| G2   | 0.82        | <b>0.46</b> | 0.99        | 0.32        |
| W3   | 0.82        | 0.99        | <b>0.47</b> | 0.31        |
| FAT% | 0.40        | 0.45        | 0.45        | <b>0.39</b> |

Table S3: Genetic parameters for body weight at different growth stages and fat content for batch 17. Heritability is on the diagonal in bold; genetic and phenotypic correlations are above the diagonal (in green) and below (in blue), respectively. Standard errors are illustrated in the parentheses.

|      | W1          | W2          | W3          | FAT%        |
|------|-------------|-------------|-------------|-------------|
| W1   | <b>0.72</b> | 0.50        | 0.34        | 0.17        |
| W2   | 0.39        | <b>0.39</b> | 0.90        | 0.46        |
| W3   | 0.27        | 0.84        | <b>0.36</b> | 0.47        |
| FAT% | 0.14        | 0.37        | 0.48        | <b>0.45</b> |

Table S4: Genetic parameters for body weight, growth and fat content for batch 17. Heritability is on the diagonal in bold; genetic and phenotypic correlations are above the diagonal (in green) and below (in blue), respectively. Standard errors are illustrated in the parentheses.

|      | G1          | G2          | W3          | FAT%        |
|------|-------------|-------------|-------------|-------------|
| G1   | <b>0.38</b> | 0.90        | 0.90        | 0.46        |
| G2   | 0.84        | <b>0.36</b> | 0.99        | 0.46        |
| W3   | 0.84        | 0.99        | <b>0.36</b> | 0.47        |
| FAT% | 0.37        | 0.48        | 0.48        | <b>0.45</b> |

### Supplementary material 1

Table S1: Genetic parameters for body weight at different growth stages and fat content for batch 16. Heritability is on the diagonal in bold; genetic and phenotypic correlations are above

the diagonal (in green) and below (in blue), respectively. Standard errors are illustrated in the parentheses.

|      | W1          | W2          | W3          | FAT%        |
|------|-------------|-------------|-------------|-------------|
| W1   | <b>0.86</b> | 0.51        | 0.32        | -0.10       |
| W2   | 0.38        | <b>0.48</b> | 0.89        | 0.31        |
| W3   | 0.23        | 0.82        | <b>0.47</b> | 0.31        |
| FAT% | 0.03        | 0.39        | 0.45        | <b>0.39</b> |

Table S2: Genetic parameters for body weight, growth and fat content for batch 16. Heritability is on the diagonal in bold; genetic and phenotypic correlations are above the diagonal (in green) and below (in blue), respectively. Standard errors are illustrated in the parentheses.

|      | G1          | G2          | W3          | FAT%        |
|------|-------------|-------------|-------------|-------------|
| G1   | <b>0.46</b> | 0.90        | 0.90        | 0.33        |
| G2   | 0.82        | <b>0.46</b> | 0.99        | 0.32        |
| W3   | 0.82        | 0.99        | <b>0.47</b> | 0.31        |
| FAT% | 0.40        | 0.45        | 0.45        | <b>0.39</b> |

Table S3: Genetic parameters for body weight at different growth stages and fat content for batch 17. Heritability is on the diagonal in bold; genetic and phenotypic correlations are above the diagonal (in green) and below (in blue), respectively. Standard errors are illustrated in the parentheses.

|      | W1          | W2          | W3          | FAT%        |
|------|-------------|-------------|-------------|-------------|
| W1   | <b>0.72</b> | 0.50        | 0.34        | 0.17        |
| W2   | 0.39        | <b>0.39</b> | 0.90        | 0.46        |
| W3   | 0.27        | 0.84        | <b>0.36</b> | 0.47        |
| FAT% | 0.14        | 0.37        | 0.48        | <b>0.45</b> |

Table S4: Genetic parameters for body weight, growth and fat content for batch 17. Heritability is on the diagonal in bold; genetic and phenotypic correlations are above the diagonal (in green) and below (in blue), respectively. Standard errors are illustrated in the parentheses.

|      | G1          | G2          | W3          | FAT%        |
|------|-------------|-------------|-------------|-------------|
| G1   | <b>0.38</b> | 0.90        | 0.90        | 0.46        |
| G2   | 0.84        | <b>0.36</b> | 0.99        | 0.46        |
| W3   | 0.84        | 0.99        | <b>0.36</b> | 0.47        |
| FAT% | 0.37        | 0.48        | 0.48        | <b>0.45</b> |
